# Supplementary material for: Development and internal validation of risk prediction model of metabolic syndrome in oil workers
Source: Springer Nature journal article supplement (doi:10.1186/s12889-020-09921-w), 2020-11-30
Supplement: MOESM3 [file 18641868]

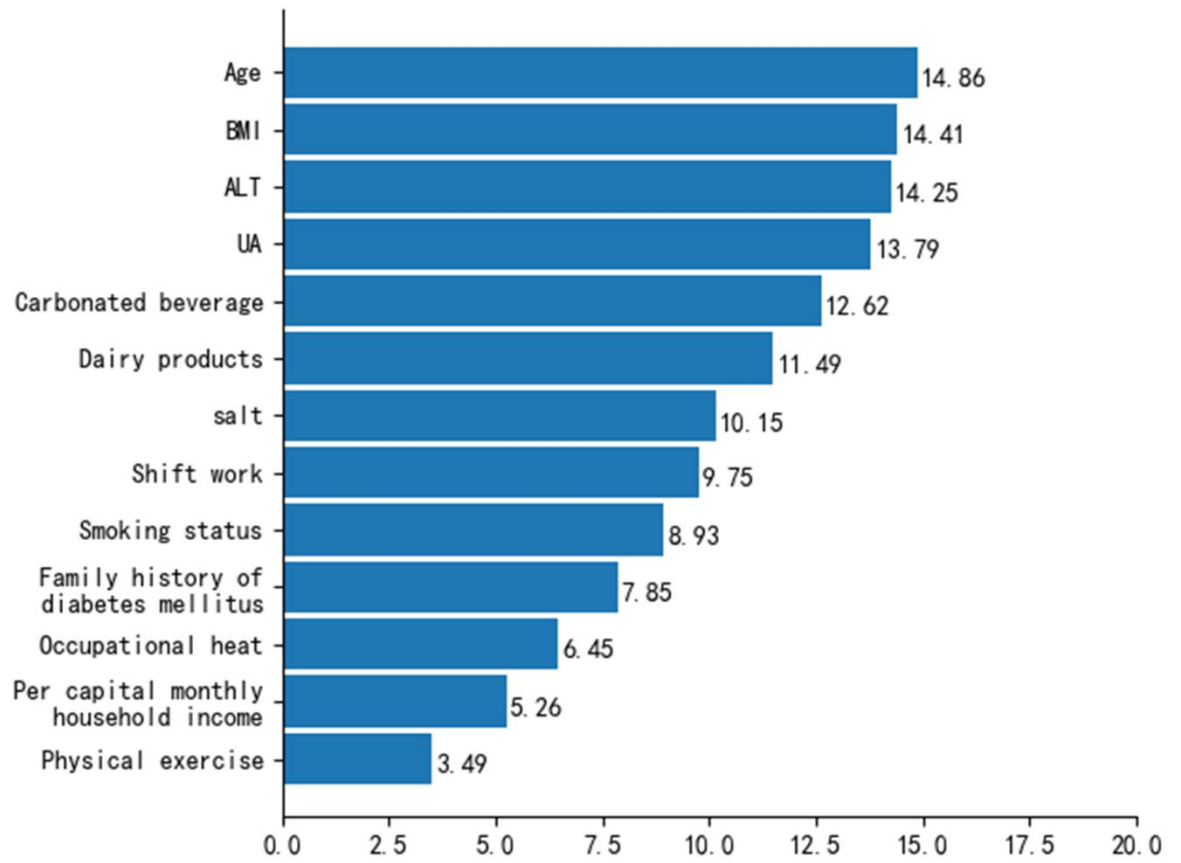

Supplementary Figure 1. The importance of predictive variables in Logistic regression model
